# Supplementary material for: Long-term treatment with interleukin-1β induces insulin resistance in murine and human adipocytes
Source: Springer Nature journal article supplement (doi:10.1007/s00125-006-0335-z), 2006-07-24
Supplement: MOESM1 [file 125_2006_335_MOESM1_ESM.doc]

Electronic supplementary material (ESM)

ESM Table 1. Primer sequences used
Murine	
Fasn	5'-TGCTCCCAGCTGCAGGC-3'		5'-GCCCGGTAGCTCTGGGTGTA-3'	
Acac	5'-GAACTCAACAGCGTACAACA-3'		5'-TGAGTCATGCCATAGTGGTT-3'	
Slc2a4	5'-CTTCTTTGAGATTGGCCCTGG-3'		5'-AGGTGAAGATGAAGAAGCCAAGC-3'	
Fabp4	5'-AACACCGAGATTTCCTT-3'		5'-ACACATTCCACCACCAG-3'	
lplL	5'-AGGACCCCTGAAGACAC-3'		5'-GGCACCCAACTCTCATA-3'	
Adiponectin	5'-AAGGACAAGGCCGTTCTCT-3		5'-TATGGGTAGTTGCAGTCAGTTG-3'	
Il1b	5'-ACACTCCTTAGTCCTCGGCCA-3'		5'-CCATCAGAGGCAAGGAGGAA-3'	
Human	
FASN	5'-GTGGCCTTTGAAATGTGCTC-3'		5'-CCTCCAGCACCCTGTTGT-3'	
ACAC	5'-GAGCAAGGGATAAGTTTGAG-3'		5'-AGGTGCATCTTGTGATTAGC-3'	
SLC2A4	5'-GCTACCTCTACATCATCCAG-3'		5'-TGTCTCGAAGATGCTGGTC-3'	
FABP4	5'-CTGGTACATGTGCAGAAATGG-3'		5'-GAACTTCAGTCCAGGTCAACG-3'	
LPL	5'-GGTCGAAGCATTGGAATCCAG-3'		5'-TAGGGCATCTGAGAACGAGTC-3'	
Adiponectin	5'-CAGAGATGGCACCCCTGGTG-3'		5'-TTCACCGATGTCTCCCTTAG-3'	
Murine/Human	
18S	5'-GAGCGAAAGCATTTGCCAAG-3'		5'-GGCATCGTTTATGGTCGGAA-3'	
